# Supplementary material for: Bewertung des Risikos für Bias in kontrollierten Studien
Source: Springer Nature journal article supplement (doi:10.1007/s00103-014-2065-6), 2014-11-08
Supplement: MOESM1 [file 8013308]

Originalfassung in: Higgins JPT, Green S (2011). *Cochrane Handbook for Systematic Reviews of Interventions* Version 5.1.0 [updated March 2011]. The Cochrane Collaboration, 2011; © The Cochrane Collaboration 2011

Die Version 5.0.1. des *Cochrane Handbook for Systematic Reviews of Interventions* wurde bei John Wiley & Sons, Inc., 2008 in Buchform veröffentlicht; © The Cochrane Collaboration 2008

© The Cochrane Collaboration 2014. This material is published with open access at Springerlink.com Open Access. This material is distributed under the terms of the Creative Commons Attribution License which permits any use, distribution, and reproduction in any medium, provided the original author(s) and the source are credited.

# Version 5.1.0

[updated March 2011]

## 8.5 Das Instrument der Cochrane Collaboration zur Bewertung des Risikos für Bias

### 8.5.1 Übersicht

Tabelle 8.5.a Das Instrument der Cochrane Collaboration zur Bewertung des Risikos für Bias

### 8.5.2 Beschreibung

Tabelle 8.5.c Beispiele für zusammenfassende Beschreibungen im Eintrag  
Sequenzgenerierung

### 8.5.3 Beurteilung

Tabelle 8.5.d Kriterien zur Beurteilung des Risikos für Bias

### 8.5.1 Übersicht

In diesem Abschnitt wird die empfohlene Vorgehensweise zur Erfassung des Risikos für Bias in Studien beschrieben, die in Cochrane-Reviews eingeschlossen wurden. Es ist ein zweiteiliges Instrument, das auf die sechs spezifischen Domänen ausgerichtet ist, die in Abschnitt 8.9 bis 8.15 behandelt werden (Generierung der Randomisierungssequenz, verdeckte Gruppenzuteilung, Verblindung von Teilnehmern und Studienpersonal, Verblindung der Endpunkterhebung, unvollständige Daten zu Endpunkten, selektives Berichten zu Endpunkten und andere Ursachen für Bias). Das Instrument ist in Tabelle 8.5.a zusammengefasst. Beachten Sie, dass das Instrument 2010 nach einem Evaluations-Projekt überarbeitet wurde. Vorgenommene Veränderungen sind in Tabelle 8.5.b zusammengefasst.

Zu jeder Domäne gehören ein oder mehrere spezifische Einträge in einer Bias-Risiko-Tabelle. Im ersten Teil jedes Eintrags wird so detailliert beschrieben, was über die Studie berichtet wurde, dass eine Beurteilung des Risikos für Bias begründbar ist. Im zweiten Teil ist eine Beurteilung des Risikos für Bias für den Eintrag abzugeben. Das geschieht mit einer Beurteilung durch: ‚Geringes Risiko‘ für Bias, ‚Hohes-Risiko‘ für Bias oder ‚Unklares Risiko‘ für Bias.

Die Domänen Generierung der Randomisierungssequenz, verdeckte Gruppenzuteilung und selektives Berichten zu Endpunkten sollten alle mit einem Eintrag für jede Studie versehen werden. Für die Domänen Verblindung von Teilnehmern und Studienpersonal, Verblindung der Endpunkterhebung und unvollständige Daten zu Endpunkten können zwei oder mehr Einträge verwendet werden, da die Beurteilungen generell getrennt nach den unterschiedlichen Endpunkten erfolgen müssen (oder für denselben Endpunkt zu unterschiedlichen Erhebungs-Zeitpunkten). Review-Autoren sollten darum bemüht sein, die Anzahl von Einträgen durch das Zusammenfassen von Endpunkten zu begrenzen, bspw. als

‚subjektive‘ oder ‚objektive‘ Endpunkte zur Bewertung von Verblindung der Endpunkterhebung oder als ‚von Patienten nach 6 Monaten berichtet‘ oder ‚von Patienten nach 12 Monaten berichtet‘ in Bezug auf unvollständige Daten zu Endpunkten. Dieselben Zusammenfassungen von Endpunkten erfolgen für jede Studie des Reviews. Die letzte Domäne (andere Ursachen für Bias) kann mit einem einzelnen Eintrag für alle Studien bearbeitet werden (Standardeinstellung in RevMan). Es wird allerdings mit Nachdruck empfohlen, mehrere, vorab festgelegte Einträge für spezifische, andere Bias-Risiken zu verwenden. Solche Autoren-spezifische Einträge können für Studien insgesamt oder für einzelne (oder zusammengefasste) Endpunkte in jeder Studie eingesetzt werden.

**Tabelle 8.5.a: Das Instrument der Cochrane Collaboration zur Bewertung des Risikos für Bias**

| <b>Domäne</b>                                                                                                                                                                 | <b>Begründung der Beurteilung</b>                                                                                                                                                                                                                                                     | <b>Beurteilung durch die Review-Autoren</b>                                                                                                |
|-------------------------------------------------------------------------------------------------------------------------------------------------------------------------------|---------------------------------------------------------------------------------------------------------------------------------------------------------------------------------------------------------------------------------------------------------------------------------------|--------------------------------------------------------------------------------------------------------------------------------------------|
| <i>Selection-Bias</i>                                                                                                                                                         |                                                                                                                                                                                                                                                                                       |                                                                                                                                            |
| <b>Generierung der Randomisierungssequenz</b>                                                                                                                                 | Beschreiben Sie die Methode zur Generierung der Randomisierungssequenz so detailliert, dass eine Bewertung darüber erfolgen kann, ob vergleichbare Gruppen entstehen konnten.                                                                                                         | <i>Selection-Bias</i> (verzerrte Zuteilung zu den Interventionen) durch inadäquate Generierung einer Randomisierungssequenz                |
| <b>Verdeckte Gruppenzuteilung</b>                                                                                                                                             | Beschreiben Sie die Methode zur Geheimhaltung der Allokation so detailliert, dass bestimmt werden kann, ob die Gruppenzuteilungen vor oder während der Aufnahme von Teilnehmern in die Studie vorhersehbar waren.                                                                     | <i>Selection-Bias</i> (verzerrte Zuteilung zu den Interventionen) durch inadäquate Geheimhaltung der Allokation vor der Zuweisung          |
| <i>Performance-Bias</i>                                                                                                                                                       |                                                                                                                                                                                                                                                                                       |                                                                                                                                            |
| <b>Verblindung von Teilnehmern und Studienpersonal:</b> Beurteilungen sollten für jeden wichtigen Endpunkt abgegeben werden (oder zusammengefasst für Gruppen von Endpunkten) | Beschreiben Sie alle Maßnahmen, die ergriffen wurden, um die Kenntnisnahme von Teilnehmern und Studienpersonal über die Intervention, die ein Teilnehmer erhielt, zu verblinden. Stellen Sie sämtliche Informationen darüber zur Verfügung, ob die geplante Verblindung effektiv war. | <i>Performance-Bias</i> durch Kenntnisnahme der Zuteilung zu den Interventionen durch Teilnehmer und Studienpersonal im Verlauf der Studie |
| <i>Detection-Bias</i>                                                                                                                                                         |                                                                                                                                                                                                                                                                                       |                                                                                                                                            |
| <b>Verblindung der Endpunkterhebung:</b> Beurteilungen sollten für jeden wichtigen Endpunkt abgegeben werden (oder zusammengefasst für Gruppen von Endpunkten)                | Beschreiben Sie alle Maßnahmen, die ergriffen wurden, um die Kenntnisnahme von Endpunkterhebern über die Intervention, die ein Teilnehmer erhielt, zu verblinden. Stellen Sie sämtliche Informationen darüber zur Verfügung, ob die geplante Verblindung effektiv war.                | <i>Detection-Bias</i> durch Kenntnisnahme der Zuteilung zu den Interventionen durch Endpunkterheber                                        |
| <i>Attrition-Bias</i>                                                                                                                                                         |                                                                                                                                                                                                                                                                                       |                                                                                                                                            |
| <b>Unvollständige Daten zu Endpunkten:</b> Beurteilungen sollten für jeden wichtigen Endpunkt abgegeben werden (oder zusammengefasst für Gruppen von Endpunkten)              | Beschreiben Sie die Vollständigkeit von Daten zu Endpunkten für jeden wesentlichen Endpunkt inklusive von Abbrüchen und Ausschlüssen aus der Analyse. Geben Sie an, ob Abbrüche und Ausschlüsse berichtet wurden, und geben Sie die Anzahl pro                                        | <i>Attrition-Bias</i> durch das Ausmaß, die Art oder den Umgang mit unvollständigen Daten zu Endpunkten                                    |

|                                           |                                                                                                                                                                                                                                                                                      |                                                                                           |
|-------------------------------------------|--------------------------------------------------------------------------------------------------------------------------------------------------------------------------------------------------------------------------------------------------------------------------------------|-------------------------------------------------------------------------------------------|
|                                           | Interventionsgruppe an (im Vergleich zu allen randomisierten Teilnehmern) sowie die Ursachen für Abbrüche/Ausschlüsse wenn genannt und jeden (Wieder-)Einschluss in Analysen, die von den Review-Autoren durchgeführt wurden.                                                        |                                                                                           |
| <i>Reporting-Bias</i>                     |                                                                                                                                                                                                                                                                                      |                                                                                           |
| <b>Selektives Berichten zu Endpunkten</b> | Geben Sie an, wie Review-Autoren die Möglichkeit für ein selektives Berichten untersucht haben und was das Ergebnis war.                                                                                                                                                             | <i>Reporting-Bias</i> durch selektives Berichten zu Endpunkten                            |
| Andere Arten von Bias                     |                                                                                                                                                                                                                                                                                      |                                                                                           |
| <b>Andere Ursachen für Bias</b>           | <p>Äußern Sie alle wesentlichen Bedenken hinsichtlich Bias, der nicht durch die Domänen des Instrumentes erfasst wurde.</p> <p>Sollten einzelne Fragen/Einträge im Review-Protokoll vorab festgelegt worden sein, sollte auf jede Frage/für jeden Eintrag eine Antwort erfolgen.</p> | Bias in Folge von Problemen, die noch nicht an anderer Stelle in der Tabelle erfasst sind |

## 8.5.2 Begründung der Beurteilung

Die Begründung der Beurteilung enthält eine kurze Zusammenfassung, auf deren Grundlage eine Beurteilung des Risikos für Bias erfolgen kann, und die dazu dient, Transparenz für die Art und Weise zu erzeugen, wie diese Beurteilungen zu Stande kommen. Die Informationen zur Beschreibung einer bestimmten Studie entstammen häufig einem einzigen veröffentlichten Studienreport, können aber auch verschiedenen Berichten, Protokollen, publizierten Kommentaren zu der Studie und Korrespondenzen mit den Untersuchern entnommen sein. Wenn möglich sollten die Beschreibungen wörtliche Zitate aus den Studien oder Korrespondenzen enthalten. Alternativ dazu oder als Ergänzung können diese auch aus einer Zusammenfassung bekannter Fakten oder Kommentaren des Review-Autors bestehen. Insbesondere sollten die Beschreibungen alle anderen Informationen enthalten, die Einfluss auf die Beurteilung hatten (wie bspw. die Kenntnis von anderen, durch dieselben Untersucher durchgeführten Studien). Eine hilfreiche Ergänzung eines nicht eindeutigen Zitats ist die jeweilige Angabe unter ‚Möglicherweise geschehen‘ oder ‚Möglicherweise nicht geschehen‘, um die Behauptung näher zu erläutern. In dem Fall, dass keine Informationen für eine Beurteilung vorliegen, ist das explizit anzugeben. Tabelle 8.5.c enthält beispielhafte Vorschläge für Beschreibungen.

**Tabelle 8.5.c: Beispiele für zusammenfassende Beschreibungen im Eintrag Generierung der Randomisierungssequenz**

|                                        |                                                                                                                                                                                                                          |
|----------------------------------------|--------------------------------------------------------------------------------------------------------------------------------------------------------------------------------------------------------------------------|
| Generierung der Randomisierungssequenz | Kommentar: keine Informationen vorhanden                                                                                                                                                                                 |
| Generierung der Randomisierungssequenz | Zitat: ‘Patients were randomly allocated’                                                                                                                                                                                |
| Generierung der Randomisierungssequenz | Zitat: ‘Patients were randomly allocated’<br>Kommentar: Möglicherweise geschehen, in früheren Berichten derselben Untersucher wird die Randomisierungsmethode klar beschrieben (Cartwright 1980)                         |
| Generierung der Randomisierungssequenz | Zitat: ‘Patients were randomly allocated’<br>Kommentar: Möglicherweise nicht geschehen, in vergleichbaren Studien derselben Autoren wird dieselbe Formulierung für eine alternierende Allokation verwendet (Winrow 1983) |
| Generierung der Randomisierungssequenz | Zitat (aus Bericht): ‘Patients were randomly allocated’<br>Kommentar (aus Korrespondenz): die Randomisierung erfolgte nach Behandlungstag<br>Kommentar: nicht randomisiert                                               |

## 8.5.3 Die Beurteilung

Die Beurteilung durch den Review-Autor sollte mit ‚Geringes Risiko‘ für Bias, ‚Hohes-Risiko‘ für Bias oder ‚Unklares Risiko‘ für Bias erfolgen. In den Bewertungen sollte wesentlicher Bias berücksichtigt werden und nicht jegliche Art von Bias. Als wesentlicher Bias ist Bias definiert, dessen Ausmaß von beträchtlicher Bedeutung für die Ergebnisse oder Schlussfolgerungen der Studie ist; zu berücksichtigen ist, dass jede dieser Bewertungen von Subjektivität begleitet ist.

In Tabelle 8.5.d sind die Kriterien für eine Beurteilung des Risikos für Bias innerhalb jeder der sechs Domänen des Bewertungsinstrumentes aufgeführt. Wenn der Bericht über die Studie nicht in ausreichender Form Details über das Verfahren enthält, sollte die Beurteilung in der Regel ‚Unklares Risiko‘ für Bias lauten. Ebenso sollte die Beurteilung ‚Unklares Risiko‘ für Bias erfolgen, wenn beschrieben ist, wie in der Studie verfahren wurde, aber das Risiko für Bias dennoch unbekannt ist, oder der Eintrag für die vorliegende Studie nicht relevant ist

(insbesondere gilt das für die Bewertung von Verblindung und von unvollständigen Daten zu Endpunkten, wenn der zu beurteilende Endpunkt nicht in der Studie erhoben wurde).

**Tabelle 8.5.d: Kriterien zur Beurteilung des Risikos für Bias im Bias-Risiko-Instrument**

| <b>Generierung der Randomisierungssequenz</b><br><i>Selection</i> -Bias (verzerrte Zuteilung zu den Interventionen) durch inadäquate Generierung einer Randomisierungssequenz |                                                                                                                                                                                                                                                                                                                                                                                                                                                                                                                                                                                                                                                                                                                                                                                                                                                                                                                                                                                                                     |
|-------------------------------------------------------------------------------------------------------------------------------------------------------------------------------|---------------------------------------------------------------------------------------------------------------------------------------------------------------------------------------------------------------------------------------------------------------------------------------------------------------------------------------------------------------------------------------------------------------------------------------------------------------------------------------------------------------------------------------------------------------------------------------------------------------------------------------------------------------------------------------------------------------------------------------------------------------------------------------------------------------------------------------------------------------------------------------------------------------------------------------------------------------------------------------------------------------------|
| Kriterien für eine Beurteilung mit ‚Geringes Risiko‘ für Bias                                                                                                                 | <p>Die Untersucher beschreiben eine Zufallskomponente bei der Sequenzgenerierung wie folgt:</p> <ul style="list-style-type: none"> <li>• Verweis auf eine Tabelle mit Zufallszahlen</li> <li>• Einsatz eines Computers als Zufallszahlen-Generator</li> <li>• Münzwurf</li> <li>• Ziehen von gemischten Karten oder Umschlägen</li> <li>• Würfeln</li> <li>• Ziehen von Losen</li> <li>• Minimierung*</li> </ul> <p>*Minimierung ohne Zufallskomponente ist äquivalent zu einer Randomisierung</p>                                                                                                                                                                                                                                                                                                                                                                                                                                                                                                                  |
| Kriterien für eine Beurteilung mit ‚Hohes Risiko‘ für Bias                                                                                                                    | <p>Die Untersucher beschreiben eine nicht zufällige Komponente bei der Sequenzgenerierung. In der Regel würde die Beschreibung ein systematisches, nicht zufälliges Verfahren enthalten wie bspw.:</p> <ul style="list-style-type: none"> <li>• Sequenzgenerierung auf der Basis von geraden oder ungeraden Geburtsdaten</li> <li>• Sequenzgenerierung nach Datum oder Tag der Klinik-Aufnahme</li> <li>• Sequenzgenerierung nach Nummer der Patientenakte</li> </ul> <p>Andere, nicht zufällige Verfahren werden weniger häufig angewendet als die oben erwähnten systematischen und sind naheliegend. Sie sind üblicherweise mit Beurteilungen oder einer nicht zufälligen Kategorisierung von Teilnehmern verbunden wie bspw.:</p> <ul style="list-style-type: none"> <li>• Allokation nach Beurteilung des Klinikern</li> <li>• Allokation nach Präferenz des Patienten</li> <li>• Allokation auf der Basis von Labortests oder Testreihen</li> <li>• Allokation nach Verfügbarkeit der Intervention</li> </ul> |
| Kriterien für eine Beurteilung mit ‚Unklares Risiko‘ für Bias                                                                                                                 | Unzureichende Informationen für eine Beurteilung mit ‚Geringes Risiko‘ oder ‚Hohes Risiko‘                                                                                                                                                                                                                                                                                                                                                                                                                                                                                                                                                                                                                                                                                                                                                                                                                                                                                                                          |
| <b>Verdeckte Gruppenzuteilung</b><br><i>Selection</i> -Bias (verzerrte Zuteilung zu den Interventionen) durch inadäquate Geheimhaltung der Allokation vor der Zuweisung       |                                                                                                                                                                                                                                                                                                                                                                                                                                                                                                                                                                                                                                                                                                                                                                                                                                                                                                                                                                                                                     |
| Kriterien für eine Beurteilung mit ‚Geringes Risiko‘ für Bias                                                                                                                 | <p>Studienpersonal und Untersucher konnten die Allokation bei der Aufnahme von Patienten nicht vorhersehen, weil nach einer der folgenden, oder äquivalenten, Methode vorgegangen wurde, um die Allokation geheim zu halten:</p> <ul style="list-style-type: none"> <li>• Zentrale Allokation (inklusive telefonischer, web-basierter und durch Apotheken kontrollierte Randomisierung)</li> </ul>                                                                                                                                                                                                                                                                                                                                                                                                                                                                                                                                                                                                                  |

|                                                                                                                                                                                                       |                                                                                                                                                                                                                                                                                                                                                                                                                                                                                                                                                                                                                                                                                              |
|-------------------------------------------------------------------------------------------------------------------------------------------------------------------------------------------------------|----------------------------------------------------------------------------------------------------------------------------------------------------------------------------------------------------------------------------------------------------------------------------------------------------------------------------------------------------------------------------------------------------------------------------------------------------------------------------------------------------------------------------------------------------------------------------------------------------------------------------------------------------------------------------------------------|
|                                                                                                                                                                                                       | <ul style="list-style-type: none"> <li>• Sequentiell nummerierte Arzneimittelverpackungen von identischem Aussehen</li> <li>• Sequentiell nummerierte, blickdichte, versiegelte Umschläge</li> </ul>                                                                                                                                                                                                                                                                                                                                                                                                                                                                                         |
| Kriterien für eine Beurteilung mit ‚Hohes Risiko‘ für Bias                                                                                                                                            | <p>Studienpersonal oder Untersucher konnten die Allokation bei der Aufnahme von Patienten möglicherweise vorhersehen und so einen <i>Selection-Bias</i> erzeugen, weil die Allokation auf Folgendem basierte:</p> <ul style="list-style-type: none"> <li>• Verwendung eines offenen Randomisierungsplans (Bsp.: Liste mit Zufallszahlen)</li> <li>• Verwendung von Umschläge zur Allokation ohne geeignete Sicherheitsmaßnahmen (Bsp.: unversiegelt, blickdurchlässig oder nicht sequentiell nummeriert)</li> <li>• Alternierend oder rotierend</li> <li>• Geburtsdatum</li> <li>• Nummer der Patientenakte</li> <li>• Andere, ausdrücklich nicht geheim gehaltene Vorgehensweise</li> </ul> |
| Kriterien für eine Beurteilung mit ‚Unklares Risiko‘ für Bias                                                                                                                                         | <p>Unzureichende Informationen für eine Beurteilung mit ‚Geringes Risiko‘ oder ‚Hohes Risiko‘; das ist in der Regel der Fall, wenn die Methode der Geheimhaltung nicht oder nicht ausreichend beschrieben ist, um eine eindeutige Beurteilung zuzulassen – bspw. wenn die Verwendung von Umschlägen beschrieben ist, aber unklar bleibt, ob diese sequentiell nummeriert, blickdicht und versiegelt sind.</p>                                                                                                                                                                                                                                                                                |
| <b>Verblindung von Teilnehmern und Studienpersonal</b><br><i>Performance</i> -Bias durch Kenntnisnahme der Zuteilung zu den Interventionen durch Teilnehmer und Studienpersonal im Verlauf der Studie |                                                                                                                                                                                                                                                                                                                                                                                                                                                                                                                                                                                                                                                                                              |
| Kriterien für eine Beurteilung mit ‚Geringes Risiko‘ für Bias                                                                                                                                         | <p>Eines der folgenden Kriterien trifft zu:</p> <ul style="list-style-type: none"> <li>• Keine Verblindung, aber die Review-Autoren beurteilen den Endpunkt als wahrscheinlich unbeeinflusst von der fehlenden Verblindung</li> <li>• Gesicherte Verblindung von Teilnehmern und wichtigem Studienpersonal und geringe Wahrscheinlichkeit für eine Entblindung</li> </ul>                                                                                                                                                                                                                                                                                                                    |
| Kriterien für eine Beurteilung mit ‚Hohes Risiko‘ für Bias                                                                                                                                            | <p>Eines der folgenden Kriterien trifft zu:</p> <ul style="list-style-type: none"> <li>• Keine Verblindung oder unvollständige Verblindung, und der Endpunkt ist wahrscheinlich durch die fehlende Verblindung beeinflusst</li> <li>• Versuch der Verblindung von wichtigen Studienteilnehmern und -personal, aber hohe Wahrscheinlichkeit für eine Entblindung, und der Endpunkt ist wahrscheinlich durch die fehlende Verblindung beeinflusst</li> </ul>                                                                                                                                                                                                                                   |
| Kriterien für eine Beurteilung mit ‚Unklares Risiko‘ für Bias                                                                                                                                         | <p>Eines der folgenden Kriterien trifft zu:</p> <ul style="list-style-type: none"> <li>• Unzureichende Informationen für eine Beurteilung mit ‚Geringes Risiko‘ oder ‚Hohes Risiko‘</li> <li>• Der Endpunkt wird in der Studie nicht untersucht</li> </ul>                                                                                                                                                                                                                                                                                                                                                                                                                                   |

## Verblindung der Endpunkterhebung

*Detection*-Bias durch Kenntnisnahme der Zuteilung zu den Interventionen durch Endpunkterheber

|                                                               |                                                                                                                                                                                                                                                                                                                                                                                                                                  |
|---------------------------------------------------------------|----------------------------------------------------------------------------------------------------------------------------------------------------------------------------------------------------------------------------------------------------------------------------------------------------------------------------------------------------------------------------------------------------------------------------------|
| Kriterien für eine Beurteilung mit ‚Geringes Risiko‘ für Bias | Eines der folgenden Kriterien trifft zu: <ul style="list-style-type: none"><li>• Keine Verblindung der Endpunkterhebung, aber die Review-Autoren beurteilen die Endpunkterhebung als wahrscheinlich unbeeinflusst durch die fehlende Verblindung</li><li>• Gesicherte Verblindung der Endpunkterhebung und geringe Wahrscheinlichkeit für eine Entblindung</li></ul>                                                             |
| Kriterien für eine Beurteilung mit ‚Hohes Risiko‘ für Bias    | Eines der folgenden Kriterien trifft zu: <ul style="list-style-type: none"><li>• Keine Verblindung der Endpunkterhebung und die Endpunkterfassung ist wahrscheinlich durch die fehlende Verblindung beeinflusst</li><li>• Verblindung der Endpunkterhebung, aber es ist wahrscheinlich, dass die Verblindung aufgehoben wurde, und die Endpunkterfassung ist wahrscheinlich durch die fehlende Verblindung beeinflusst</li></ul> |
| Kriterien für eine Beurteilung mit ‚Unklares Risiko‘ für Bias | Eines der folgenden Kriterien trifft zu: <ul style="list-style-type: none"><li>• Unzureichende Informationen für eine Beurteilung mit ‚Geringes Risiko‘ oder ‚Hohes Risiko‘</li><li>• Der Endpunkt wird in der Studie nicht untersucht</li></ul>                                                                                                                                                                                 |

## Unvollständige Daten zu Endpunkten

*Attrition*-Bias durch das Ausmaß, die Art oder den Umgang mit unvollständigen Daten zu Endpunkten

|                                                               |                                                                                                                                                                                                                                                                                                                                                                                                                                                                                                                                                                                                                                                                                                                                                                                                                                                                                                                                                                                                                                                                                                   |
|---------------------------------------------------------------|---------------------------------------------------------------------------------------------------------------------------------------------------------------------------------------------------------------------------------------------------------------------------------------------------------------------------------------------------------------------------------------------------------------------------------------------------------------------------------------------------------------------------------------------------------------------------------------------------------------------------------------------------------------------------------------------------------------------------------------------------------------------------------------------------------------------------------------------------------------------------------------------------------------------------------------------------------------------------------------------------------------------------------------------------------------------------------------------------|
| Kriterien für eine Beurteilung mit ‚Geringes Risiko‘ für Bias | Eines der folgenden Kriterien trifft zu: <ul style="list-style-type: none"><li>• Keine fehlenden Daten zu Endpunkten</li><li>• Die Ursachen für fehlende Daten zu Endpunkten stehen wahrscheinlich nicht im Zusammenhang mit den tatsächlichen Ergebnissen (es ist unwahrscheinlich, dass Zensieren von Überlebensdaten Bias erzeugt)</li><li>• Die Anzahl fehlender Daten ist zwischen den Interventionsgruppen gleich verteilt und die Ursachen sind vergleichbar</li><li>• Bei dichotomen Endpunkten ist das Verhältnis von fehlenden Daten im Vergleich zu dem beobachteten Ereignisrisiko nicht groß genug, um eine klinisch relevante Bedeutung für den geschätzten Effekt der Intervention zu erzeugen</li><li>• Bei Endpunkten mit stetiger Verteilung ist die Plausibilität für die Effektgröße (Unterschied in Mittelwerten oder standardisierter Unterschied in Mittelwerten) fehlender Daten nicht so stark, dass sie eine klinisch relevante Bedeutung für die beobachtete Effektgröße hätte</li><li>• Fehlende Daten wurden unter Anwendung geeigneter Methoden imputiert</li></ul> |
|---------------------------------------------------------------|---------------------------------------------------------------------------------------------------------------------------------------------------------------------------------------------------------------------------------------------------------------------------------------------------------------------------------------------------------------------------------------------------------------------------------------------------------------------------------------------------------------------------------------------------------------------------------------------------------------------------------------------------------------------------------------------------------------------------------------------------------------------------------------------------------------------------------------------------------------------------------------------------------------------------------------------------------------------------------------------------------------------------------------------------------------------------------------------------|

|                                                                                                             |                                                                                                                                                                                                                                                                                                                                                                                                                                                                                                                                                                                                                                                                                                                                                                                                                                                                                                                                                                                                                                                                                                 |
|-------------------------------------------------------------------------------------------------------------|-------------------------------------------------------------------------------------------------------------------------------------------------------------------------------------------------------------------------------------------------------------------------------------------------------------------------------------------------------------------------------------------------------------------------------------------------------------------------------------------------------------------------------------------------------------------------------------------------------------------------------------------------------------------------------------------------------------------------------------------------------------------------------------------------------------------------------------------------------------------------------------------------------------------------------------------------------------------------------------------------------------------------------------------------------------------------------------------------|
| Kriterien für eine Beurteilung mit ‚Hohes Risiko‘ für Bias                                                  | <p>Eines der folgenden Kriterien trifft zu:</p> <ul style="list-style-type: none"> <li>Die Ursachen für fehlende Daten zu Endpunkten stehen wahrscheinlich im Zusammenhang mit den tatsächlichen Ergebnissen; entweder durch fehlende Balance zwischen den Gruppen in der Anzahl oder in den Ursachen für fehlende Daten</li> <li>Bei dichotomen Endpunkten ist das Verhältnis von fehlenden Daten im Vergleich zu dem beobachteten Ereignisrisiko groß genug, um einen klinisch relevanten Bias im geschätzten Effekt der Intervention zu erzeugen</li> <li>Bei Endpunkten mit stetiger Verteilung ist die Plausibilität für die Effektgröße (Unterschied in Mittelwerten oder standardisierter Unterschied in Mittelwerten) fehlender Daten so stark, dass ein klinisch relevanter Bias in der beobachteten Effektgröße entstanden sein kann</li> <li>Durchführung einer As-treated-Analyse mit wesentlicher Abweichung von der Intervention, zu der Teilnehmer durch die Randomisierung zugeordnet waren</li> <li>Möglicherweise ungeeignete Anwendung einer einfachen Imputation</li> </ul> |
| Kriterien für eine Beurteilung mit ‚Unklares Risiko‘ für Bias                                               | <p>Eines der folgenden Kriterien trifft zu:</p> <ul style="list-style-type: none"> <li>Unzureichender Bericht über Abbrüche/Ausschlüsse für eine Beurteilung mit ‚Geringes Risiko‘ oder ‚Hohes Risiko‘ (Bsp.: weder ist die Anzahl randomisierter Teilnehmer angegeben, noch Ursachen für fehlende Daten)</li> <li>Der Endpunkt wird in der Studie nicht untersucht</li> </ul>                                                                                                                                                                                                                                                                                                                                                                                                                                                                                                                                                                                                                                                                                                                  |
| <b>Selektives Berichten zu Endpunkten</b><br><i>Reporting-Bias durch selektives Berichten zu Endpunkten</i> |                                                                                                                                                                                                                                                                                                                                                                                                                                                                                                                                                                                                                                                                                                                                                                                                                                                                                                                                                                                                                                                                                                 |
| Kriterien für eine Beurteilung mit ‚Geringes Risiko‘ für Bias                                               | <p>Eines der folgenden Kriterien trifft zu:</p> <ul style="list-style-type: none"> <li>Das Studienprotokoll ist verfügbar und alle vorab festgelegten Endpunkte (primär und sekundär), die für den Review von Bedeutung sind, wurden in der vorab festgelegten Weise berichtet</li> <li>Das Studienprotokoll ist nicht verfügbar, aber es ist eindeutig, dass die veröffentlichten Berichte alle zu erwartenden Endpunkte inklusive der vorab festgelegten enthalten (ein überzeugender Text dieser Art mag selten sein)</li> </ul>                                                                                                                                                                                                                                                                                                                                                                                                                                                                                                                                                             |
| Kriterien für eine Beurteilung mit ‚Hohes Risiko‘ für Bias                                                  | <p>Eines der folgenden Kriterien trifft zu:</p> <ul style="list-style-type: none"> <li>Nicht alle der vorab festgelegten primären Endpunkte wurden berichtet</li> <li>Ein oder mehrere primäre Endpunkte wurden mit nicht vorab festgelegten Mess- oder Analysemethoden oder mit Teilmengen von Daten (bspw. Subskalen) berichtet</li> <li>Ein oder mehrere berichtete primäre Endpunkte waren nicht vorab festgelegt (es sei denn, dass eindeutige Vorgaben für den Bericht vorgesehen waren wie z.B. unerwartete unerwünschte Ereignisse)</li> </ul>                                                                                                                                                                                                                                                                                                                                                                                                                                                                                                                                          |

|                                                                                                                              |                                                                                                                                                                                                                                                                                                                                                        |
|------------------------------------------------------------------------------------------------------------------------------|--------------------------------------------------------------------------------------------------------------------------------------------------------------------------------------------------------------------------------------------------------------------------------------------------------------------------------------------------------|
|                                                                                                                              | <ul style="list-style-type: none"> <li>• Ein oder mehrere Endpunkte mit Bedeutung für den Review sind unvollständig berichtet und können daher nicht für eine Meta-Analyse verwendet werden</li> <li>• Ergebnisse für einen wesentlichen Endpunkt sind entgegen der Erwartung aufgrund der Art der Studie nicht im Studienbericht enthalten</li> </ul> |
| Kriterien für eine Beurteilung mit ‚Unklares Risiko‘ für Bias                                                                | Unzureichende Informationen für eine Beurteilung mit ‚Geringes Risiko‘ oder ‚Hohes Risiko‘; es ist wahrscheinlich, dass der überwiegende Anteil der Studien in diese Kategorie fällt.                                                                                                                                                                  |
| <b>Andere Ursachen für Bias</b><br>Bias in Folge von Problemen, die noch nicht an anderer Stelle in der Tabelle erfasst sind |                                                                                                                                                                                                                                                                                                                                                        |
| Kriterien für eine Beurteilung mit ‚Geringes Risiko‘ für Bias                                                                | Die Studie scheint frei von anderen Ursachen für Bias                                                                                                                                                                                                                                                                                                  |
| Kriterien für eine Beurteilung mit ‚Hohes Risiko‘ für Bias                                                                   | <p>Es besteht mindestens ein bedeutendes Risiko für Bias. Bspw.:</p> <ul style="list-style-type: none"> <li>• liegt eine mögliche Bias-Ursache im spezifischen Studientyp oder</li> <li>• es wird Studienautoren wissenschaftliches Fehlverhalten vorgeworfen oder</li> <li>• es bestanden andere Probleme</li> </ul>                                  |
| Kriterien für eine Beurteilung mit ‚Unklares Risiko‘ für Bias                                                                | <p>Möglicherweise besteht ein Risiko für Bias, aber entweder:</p> <ul style="list-style-type: none"> <li>• sind die Informationen für eine Bewertung darüber unzureichend, ob ein bedeutendes Risiko für Bias vorliegt, oder</li> <li>• Rationale oder Evidenz sind nicht ausreichend dafür, dass ein erkanntes Problem Bias erzeugen wird</li> </ul>  |
